# Supplementary material
Source: bioRxiv or medRxiv preprint supplement (http://medrxiv.stage.highwire.org/highwire/filestream/94675/field_highwire_adjunct_files/0/2020.08.25.20182030-1.pdf)
Supplement: Supplementary file [file 2020.08.25.20182030-1.pdf]

**Supplementary Table 1: Equations and initial values for dynamic compartmental transmission models**

| Compartment      | Equation                                                      | Initial parameters for each strategy |                     |                                           |                     |                     |
|------------------|---------------------------------------------------------------|--------------------------------------|---------------------|-------------------------------------------|---------------------|---------------------|
|                  |                                                               | No action                            | Pre-arrival testing | Phased reopening with pre-arrival testing |                     |                     |
|                  |                                                               | Day 0 <sup>a</sup>                   | Day 0 <sup>a</sup>  | Day 0 <sup>b</sup>                        | Day 30 <sup>c</sup> | Day 60 <sup>a</sup> |
| Susceptible (S)  | $dS(t) = -\beta \times (A + I) \times S/N$                    | $S_0 = 6600$                         | $S_0 = 6735$        | $S_0 = 2245$                              | $S_{30} + S_0$      | $S_{60} + S_0$      |
| Exposed (E)      | $dE(t) = \beta \times (A + I) \times S/N - \sigma \times E$   | $E_0 = 0$                            | $E_0 = 0$           | $E_0 = 0$                                 | $E_{30} + E_0$      | $E_{60} + E_0$      |
| Asymptomatic (A) | $dA(t) = (1 - \alpha) \times \sigma \times E - \phi \times A$ | $A_0 = 150$                          | $A_0 = 15$          | $A_0 = 5$                                 | $A_{30} + A_0$      | $A_{60} + A_0$      |
| Symptomatic (I)  | $dI(t) = \alpha \times \sigma \times E - \gamma \times I$     | $I_0 = 0$                            | $I_0 = 0$           | $I_0 = 0$                                 | $I_{30} + I_0$      | $I_{60} + I_0$      |
| Isolation (Q)    | $dQ(t) = \gamma \times I - \rho \times Q$                     | $Q_0 = 0$                            | $Q_0 = 0$           | $Q_0 = 0$                                 | $Q_{30} + Q_0$      | $Q_{60} + Q_0$      |
| Recovered (R)    | $dR(t) = \phi \times A + \rho \times Q$                       | $R_0 = 750$                          | $R_0 = 750$         | $R_0 = 250$                               | $R_{30} + R_0$      | $R_{60} + R_0$      |

Models assume population size of  $N = 7500$  and 2% active infection rate at semester start (day 0).  $S_j$ ,  $E_j$ ,  $A_j$ ,  $I_j$ ,  $Q_j$ , and  $R_j$  indicate the number of individuals in each compartment on day  $j$  (e.g.,  $A_0$  is the number of asymptomatic individuals on day 0). Infectious individuals return to campus through compartment A. When no action is taken, the number of infected individuals on day 0 is given by  $A_0 = N \cdot 0.02$ . Pre-arrival testing assuming 90% test sensitivity yields  $A_0 = N \cdot 0.02 \cdot 0.90$ . Phased reopening with pre-arrival testing yields  $A_0 = N^* \cdot 0.02 \cdot 0.90$ , where  $N^* = 2500$  is the number of students returning to campus during the first phase.

<sup>a</sup> Sum of compartments: 7500

<sup>b</sup> Sum of compartments: 2500

<sup>c</sup> Sum of compartments: 5000
